# Supplementary material for: The Co-Association of Enterobacteriaceae and Pseudomonas with Specific Resistant Cucumber against Fusarium Wilt Disease
Source: MDPI journal article supplement (doi:10.3390/biology12020143), 2023-01-17
Supplement: s1 [file s1]

Supplementary Materials

# The Co-Association of Enterobacteriaceae and *Pseudomonas* with Specific Resistant Cucumber against *Fusarium* Wilt Disease

Yu-Lu Zhang, Xiao-Jing Guo, Xin Huang, Rong-Jun Guo, Xiao-Hong Lu and Shi-Dong Li, Hao Zhang

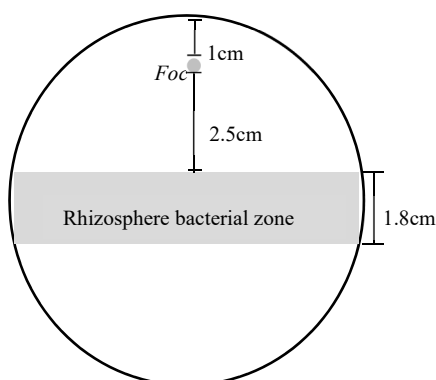

**Figure S1.** Demonstration of the isolation strategy of antagonistic bacteria.

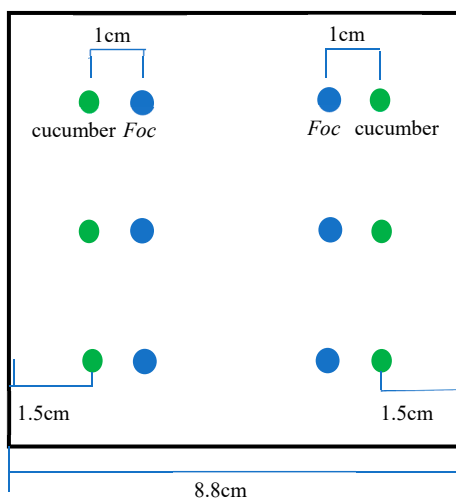

**Figure S2.** Demonstration of *Foc* inoculation site to the cucumber seedlings grown in bacteria inoculated soil.

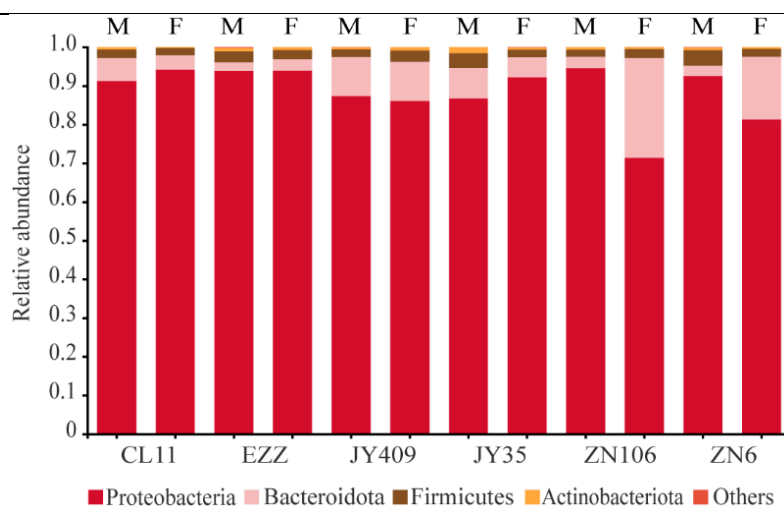

**Figure S3.** Taxonomic profiling of the bacterial communities in cucumber root across cultivars and treatments at phylum level. Phyla with a proportion of less than 1.0% are combined into the group “Others”. CL11, EZZ and JY409 are resistant cultivars, JY35 and ZN106 are moderately resistant cultivars, and ZN6 is a susceptible cultivar. M and F indicate mock and *Foc* inoculation, respectively.

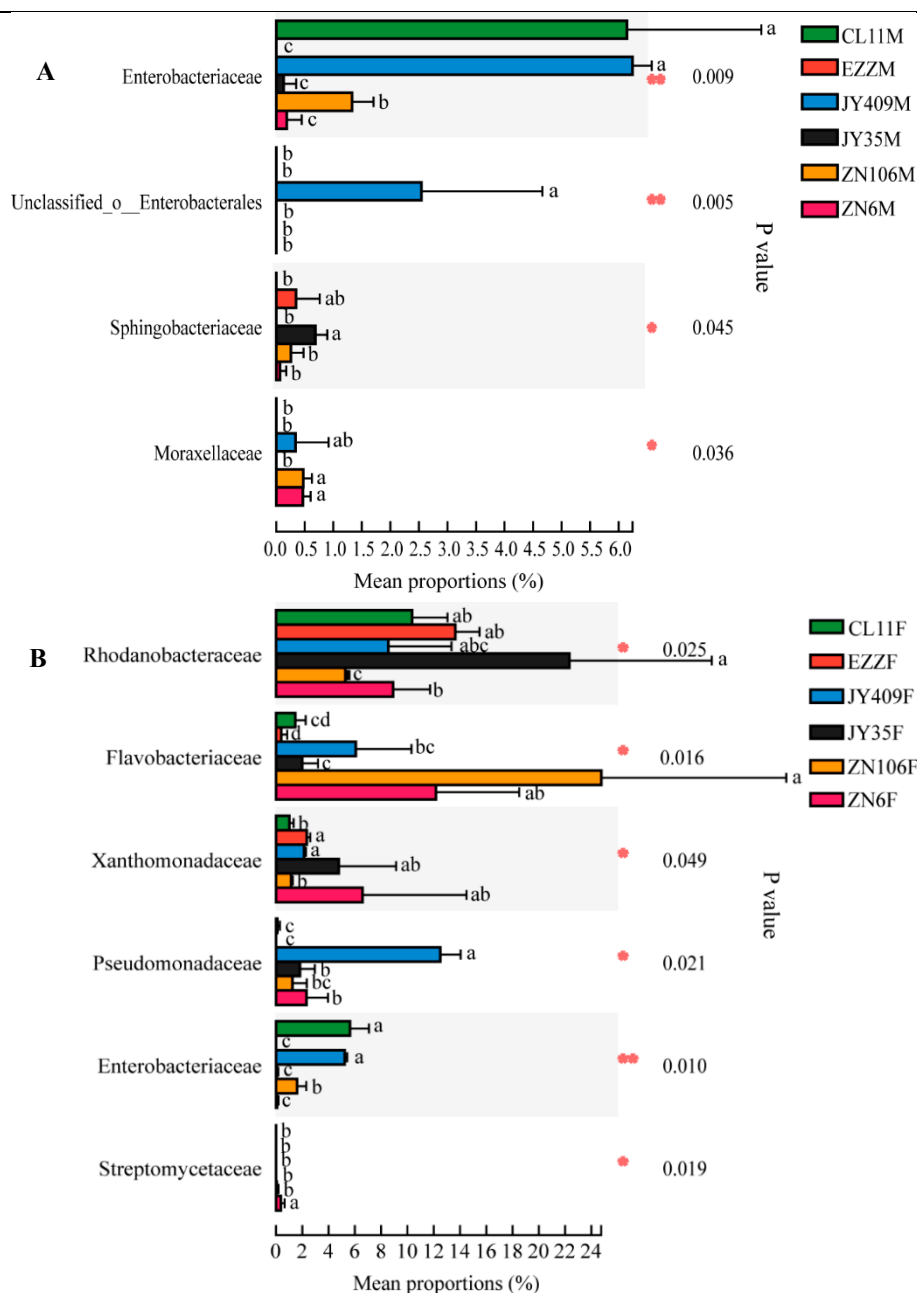

**Figure S4.** Differential bacterial phyla among cucumber cultivars with mock (A) and *Foc* inoculation (B). Data were tested by Kruskal-Wallis H test ( $p < 0.05$ ) and validated by False Discovery Rate (FDR) and Tukey-Kramer with a confidence level of 0.95. \*,  $0.01 < p \leq 0.05$ ; \*\*,  $0.001 < p \leq 0.01$ . Different letters beside the error bars of each phylum indicate significant difference among cultivars ( $p < 0.05$ ).

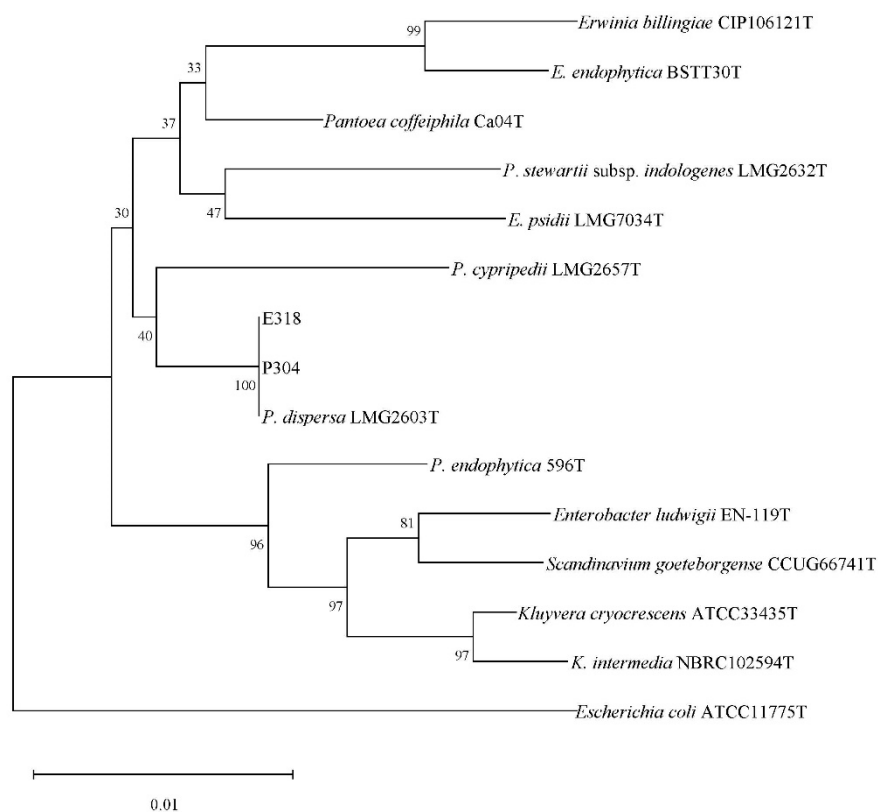

**Figure S5.** Phylogenetic trees of strain P304 and E318 based on their 16S rRNA gene sequences determined by the neighbor-joining method with the program package MEGA 11.0. Bootstrap confidence values were obtained using 2000 resamplings. Bar, 0.01 substitutions per site.

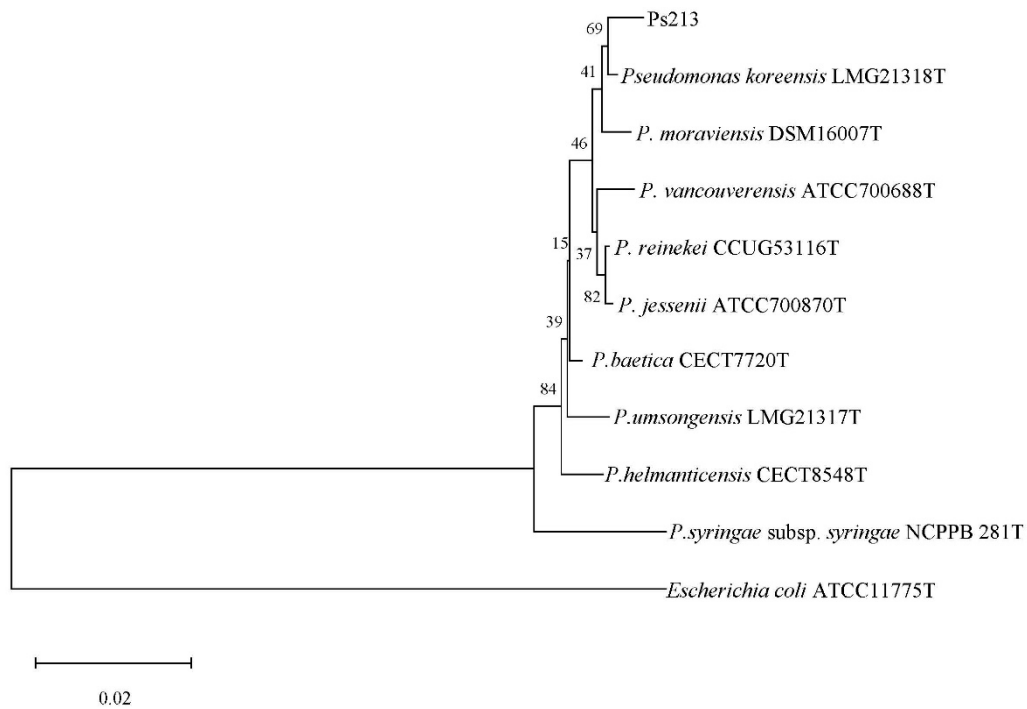

**Figure S6.** Phylogenetic tree of strain Ps213 based on its 16S rRNA gene sequence determined by the neighbor-joining method with the program package MEGA 11.0. Bootstrap confidence values were obtained using 2000 resamplings. Bar, 0.02 substitutions per site.

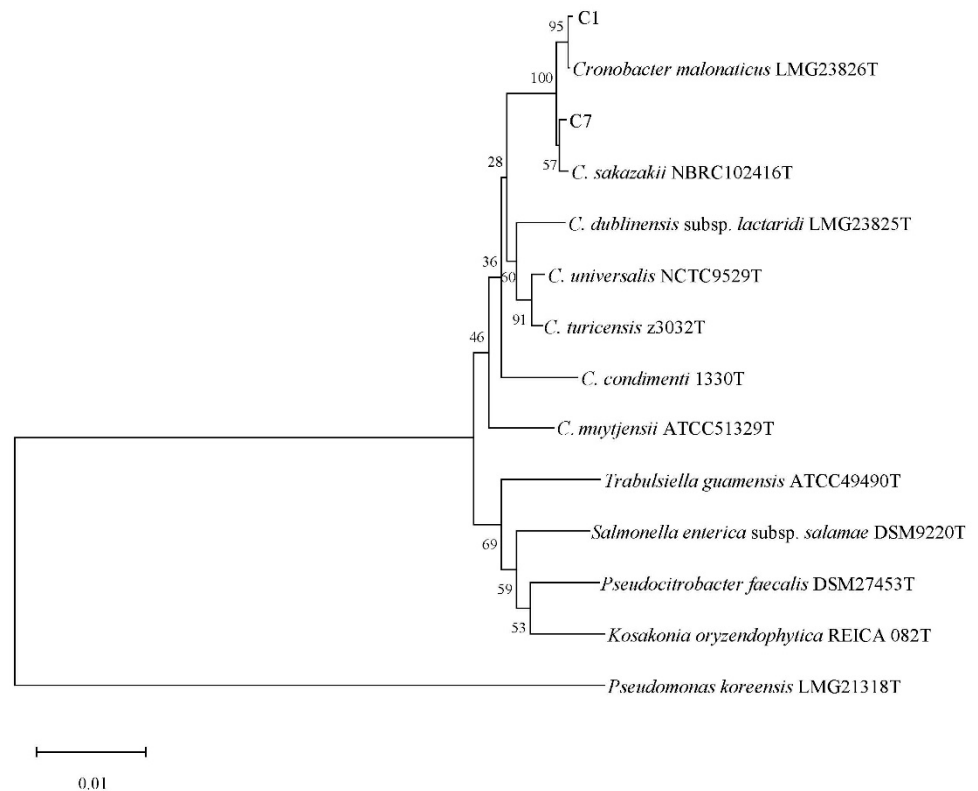

**Figure S7.** Phylogenetic trees of strain C1 and C7 based on their 16S rRNA gene sequences determined by the neighbor-joining method with the program package MEGA 11.0. Bootstrap confidence values were obtained using 2000 resamplings. Bar, 0.01 substitutions per site.

**Table S1.** Resistance of cucumber cultivars to CFW<sup>a</sup>.

| Cucumber cultivar | Disease incidence (%) |     | Disease index |    | Resistance           |
|-------------------|-----------------------|-----|---------------|----|----------------------|
| CL11              | 0.00 ± 0.00           | a   | 0.00 ± 0.00   | a  | Resistant            |
| EZZ               | 0.00 ± 0.00           | a   | 0.00 ± 0.00   | a  | Resistant            |
| JY409             | 16.67 ± 0.00          | abc | 8.32 ± 4.17   | ab | Resistant            |
| JY35              | 38.89 ± 9.62          | c   | 23.61 ± 6.36  | b  | Moderately resistant |
| ZN106             | 33.34 ± 28.87         | bc  | 15.27 ± 15.78 | ab | Moderately resistant |
| ZN6               | 88.89 ± 19.24         | d   | 51.39 ± 17.35 | c  | Susceptible          |

<sup>a</sup> Different letters of the same column showed significant difference at  $p < 0.05$  based on the Duncan's new multiple-range test

**Table S2.** Relative abundance of the predominant genera (>5.00%) in cucumber root.

| Cultivar | Treatment              | The relative abundance (%) |                               |                                 |                    |                       |                             |                 |                      |                         |                                 |
|----------|------------------------|----------------------------|-------------------------------|---------------------------------|--------------------|-----------------------|-----------------------------|-----------------|----------------------|-------------------------|---------------------------------|
|          |                        | <i>Massilia</i>            | Unclassified Oxalobacteraceae | Unclassified Rhodanobacteraceae | <i>Pseudomonas</i> | <i>Flavobacterium</i> | Unclassified Alcaligenaceae | <i>Shinella</i> | <i>Brevendimonas</i> | <i>Stenotrophomonas</i> | Unclassified Enterobacteriaceae |
| CL11     | Mock                   | 41.65                      | 0.00                          | 26.02                           | 0.12               | 4.31                  | 3.83                        | 3.54            | 0.81                 | 0.33                    | 3.95                            |
| EZZ      |                        | 47.83                      | 0.75                          | 21.9                            | 0.28               | 1.06                  | 7.31                        | 4.1             | 1.26                 | 0.69                    | 0.00                            |
| JY409    |                        | 28.08                      | 0.13                          | 13.08                           | 13.86              | 6.56                  | 5.89                        | 3.83            | 1.56                 | 1.66                    | 5.67                            |
| JY35     |                        | 39.71                      | 0.92                          | 15.40                           | 0.15               | 4.28                  | 9.33                        | 7.56            | 1.24                 | 0.64                    | 0.13                            |
| ZN106    |                        | 56.49                      | 0.87                          | 18.80                           | 0.00               | 1.31                  | 5.4                         | 3.68            | 1.45                 | 0.28                    | 0.05                            |
| ZN6      |                        | 49.77                      | 1.12                          | 20.03                           | 0.53               | 0.66                  | 5.06                        | 4.15            | 1.7                  | 0.72                    | 0.16                            |
| CL11     | <i>Foc</i> inoculation | 61.55                      | 0.12                          | 10.09                           | 0.11               | 1.47                  | 4.75                        | 4.89            | 0.57                 | 1.02                    | 3.67                            |
| EZZ      |                        | 53.73                      | 0.05                          | 13.64                           | 0.00               | 0.4                   | 7.5                         | 6.61            | 1.94                 | 1.04                    | 0.00                            |
| JY409    |                        | 39.42                      | 0.16                          | 8.47                            | 12.51              | 6.07                  | 5.68                        | 3.46            | 2.3                  | 1.3                     | 5.02                            |
| JY35     |                        | 29.29                      | 0.30                          | 21.63                           | 1.82               | 1.99                  | 8.73                        | 6.19            | 3.25                 | 4.45                    | 0.05                            |
| ZN106    |                        | 42.57                      | 0.36                          | 5.18                            | 1.25               | 24.75                 | 5.83                        | 4.87            | 2.58                 | 0.94                    | 0.88                            |
| ZN6      |                        | 9.36                       | 25.22                         | 7.16                            | 2.32               | 12.17                 | 7.85                        | 7.04            | 5.89                 | 5.03                    | 0.00                            |

**Table S3.** Comparison of the relative abundance of *Massilia* and unclassified Oxalobacteraceae against the whole family Oxalobacteraceae in the cucumber root microbiota.

| Cultivar | Treatment              | The relative abundance (%) |                                                 |                 |
|----------|------------------------|----------------------------|-------------------------------------------------|-----------------|
|          |                        | Oxalobacteraceae           | <i>Massilia</i> + unclassified Oxalobacteraceae | Proportions (%) |
| CL11     | Mock                   | 42.29                      | 41.65                                           | 98.49           |
| EZZ      |                        | 48.88                      | 48.58                                           | 99.39           |
| JY409    |                        | 28.20                      | 28.21                                           | 100.04          |
| JY35     |                        | 40.63                      | 40.63                                           | 100.00          |
| ZN106    |                        | 57.36                      | 57.36                                           | 100.00          |
| ZN6      |                        | 50.98                      | 50.89                                           | 99.82           |
| CL11     | <i>Foc</i> inoculation | 61.80                      | 61.67                                           | 99.79           |
| EZZ      |                        | 53.82                      | 53.78                                           | 99.93           |
| JY409    |                        | 39.71                      | 39.58                                           | 99.67           |
| JY35     |                        | 29.77                      | 29.59                                           | 99.40           |
| ZN106    |                        | 42.92                      | 42.93                                           | 100.02          |
| ZN6      |                        | 34.61                      | 34.58                                           | 99.91           |

**Table S4.** Permutational multivariate analysis of variance (PERMANOVA) of the root bacterial microbiota of cucumber roots with (Group F) or without *Foc* (Group M) inoculation based on Bray-Curtis dissimilarity and 999 permutations.

| Source       | Df | Sums of Sq | Mean Sq | F Model | R <sup>2</sup> | Pr (> F) |
|--------------|----|------------|---------|---------|----------------|----------|
| Group M      |    |            |         |         |                |          |
| Cultivar     | 5  | 0.86       | 0.17    | 1.25    | 0.34           | 0.156    |
| Residuals    | 12 | 1.65       | 0.14    |         | 0.66           |          |
| Total        | 17 | 2.51       |         |         | 1              |          |
| Group F      |    |            |         |         |                |          |
| Cultivar     | 5  | 1.72       | 0.34    | 2.64    | 0.52           | 0.001    |
| Residuals    | 12 | 1.56       | 0.13    |         | 0.48           |          |
| Total        | 17 | 3.28       |         |         |                |          |
| Groups M & F |    |            |         |         |                |          |
| Cultivar     | 5  | 1.57       | 0.31    | 2.16    | 0.26           | 0.001    |
| Inoculation  | 1  | 0.25       | 0.25    | 1.75    | 0.04           | 0.040    |
| Residuals    | 29 | 4.22       | 0.15    |         | 0.70           |          |
| Total        | 35 | 6.04       |         |         | 1.00           |          |

**Table S5.** Analysis of similarity (ANOSIM) of the cucumber cultivars with mock (M) or *Foc* inoculation (F).

| Paired groups     | R value | <i>p</i> value |
|-------------------|---------|----------------|
| CL11M vs. CL11F   | 0.44    | 0.10           |
| EZZM vs. EZZF     | 0.04    | 0.51           |
| JY409M vs. JY409F | −0.04   | 0.62           |
| JY35M vs. JY35F   | 0.11    | 0.49           |
| ZN106M vs. ZN106F | 0.52    | 0.10           |
| ZN6M vs. ZN6F     | 0.41    | 0.19           |



**Table S6.** Differential bacterial ASVs across cucumber cultivars with mock or *Foc* inoculation <sup>a</sup>.

| Treatment                   | Differential ASV | Genus                                 | Proportions (%) |  |                  |  |                 |  |                |  | <i>p</i> value   |       |               |     |      |
|-----------------------------|------------------|---------------------------------------|-----------------|--|------------------|--|-----------------|--|----------------|--|------------------|-------|---------------|-----|------|
|                             |                  |                                       | CL11            |  | EZZ              |  | JY409           |  | JY35           |  |                  | ZN106 |               | ZN6 |      |
| Mock inocula-<br>tion       | ASV162           | <i>Cronobacter</i>                    | 1.75 ± 3.03 a   |  | 0 ± 0 a          |  | 0 ± 0 a         |  | 0 ± 0 a        |  | 1.25 ± 0.34 b    |       | 0 ± 0 a       |     | 0.03 |
|                             | ASV103           | <i>Pseudomonas</i>                    | 0 ± 0 a         |  | 0 ± 0 a          |  | 1.87 ± 0.36 b   |  | 0 ± 0 a        |  | 0 ± 0 a          |       | 0 ± 0 a       |     | 0.00 |
|                             | ASV124           | <i>Noviherbaspirillum</i>             | 0.65 ± 0.46 a   |  | 0.24 ± 0.41 ab   |  | 0 ± 0 b         |  | 0 ± 0 b        |  | 0 ± 0 b          |       | 0.09 ± 0.15 b |     | 0.05 |
|                             | ASV74            | <i>Massilia</i>                       | 0.02 ± 0.03 a   |  | 0 ± 0 a          |  | 0 ± 0 a         |  | 0 ± 0 a        |  | 0 ± 0 a          |       | 0.15 ± 0.05 b |     | 0.01 |
| <i>Foc</i> inocula-<br>tion | ASV1             | <i>Massilia</i>                       | 52.55 ± 7.44 a  |  | 41.76 ± 11.21 ab |  | 32.96 ± 8.94 bc |  | 23.12 ± 3.15 c |  | 34.61 ± 12.93 bc |       | 5.36 ± 9.29 d |     | 0.03 |
|                             | ASV95            | <i>Flavobacterium</i>                 | 1.25 ± 0.94 a   |  | 0.074 ± 0.13 a   |  | 5.79 ± 4.19 a   |  | 0.66 ± 1.14 a  |  | 23.79 ± 13.80 b  |       | 0.10 ± 0.17 a |     | 0.03 |
|                             | ASV4             | <i>Massilia</i>                       | 6.24 ± 2.82 a   |  | 6.41 ± 2.03 a    |  | 3.84 ± 0.31 ab  |  | 2.75 ± 0.36 bc |  | 4.55 ± 0.94 ab   |       | 0.55 ± 0.95 c |     | 0.02 |
|                             | ASV48            | <i>Pseudomonas</i>                    | 0.11 ± 0.20 a   |  | 0 ± 0 a          |  | 10.98 ± 1.02 b  |  | 1.44 ± 1.40 ac |  | 1.11 ± 0.96 ac   |       | 1.97 ± 1.03 c |     | 0.03 |
|                             | ASV103           | <i>Pseudomonas</i>                    | 0 ± 0 a         |  | 0 ± 0 a          |  | 1.53 ± 0.56 b   |  | 0 ± 0 a        |  | 0.14 ± 0.24 a    |       | 0.16 ± 0.27 a |     | 0.03 |
|                             | ASV33            | Unclassified_f_<br>Rhodanobacteraceae | 0.02 ± 0.03 a   |  | 0.11 ± 0.04 b    |  | 0 ± 0 a         |  | 0 ± 0 a        |  | 0 ± 0 a          |       | 0 ± 0 a       |     | 0.01 |

<sup>a</sup>Data were analyzed by the Kruskal-Wallis H test and verified by FDR and Tukey-Kramer with the confidence at 0.95; different letters of the same row showed significant difference at  $p < 0.05$ .

**Table S7.** Isolation and identification of the culturable bacteria isolated from cucumber roots by using the conventional plating method.

| Cucumber cultivar | Isolates           | Inhibitory rate (%)            | Taxa based on 16S rRNA gene sequences | Taxa and ASVs based on Illumina high-throughput analysis |        | Homology (%) |
|-------------------|--------------------|--------------------------------|---------------------------------------|----------------------------------------------------------|--------|--------------|
|                   |                    |                                |                                       | Genus                                                    | ASV    |              |
| CL11              | P25, P26, P28, P29 | 33.17 ± 2.93<br>~ 37.77 ± 2.60 | <i>Pantoea</i>                        | Unclassified_o__Enterobacterales                         | ASV410 | 93.1–97.6    |
|                   | D34, D37, D39      | 17.78 ± 2.13<br>~ 19.10 ± 1.60 | <i>Delftia</i>                        | <i>Delftia</i>                                           | ASV104 | 100.0        |
|                   | S36                | 22.36 ± 2.36                   | <i>Sphingomonas</i>                   | <i>Sphingomonas</i>                                      | ASV329 | 98.7         |
|                   | D38                | 23.50 ± 5.32                   | <i>Roseomonas</i>                     | <i>Devosia</i>                                           | ASV497 | 87.4         |
|                   | S40                | 25.91 ± 3.45                   | <i>Sphingomonas</i>                   | <i>Sphingomonas</i>                                      | ASV19  | 100.0        |
|                   | S41                | 29.82 ± 3.29                   | <i>Hephaestia</i>                     | <i>Hephaestia</i>                                        | ASV548 | 99.4         |
|                   | S42                | 22.90 ± 2.78                   | <i>Sphingomonas</i>                   | <i>Sphingomonas</i>                                      | ASV375 | 97.4         |
| JY409             | D43                | 28.82 ± 3.01                   | <i>Roseomonas</i>                     | <i>Devosia</i>                                           | ASV497 | 87.4         |
|                   | Sh44               | 13.34 ± 1.13                   | <i>Shinella</i>                       | <i>Shinella</i>                                          | ASV40  | 100.0        |
|                   | Bo45               | 18.12 ± 2.65                   | <i>Bosea</i>                          | <i>Bosea</i>                                             | ASV290 | 100.0        |
|                   | Ps213              | 21.63 ± 4.41                   | <i>Pseudomonas</i>                    | <i>Pseudomonas</i>                                       | ASV466 | 99.7         |
| ZN6               | Ps15-Ps19          | 22.37 ± 2.61<br>~ 25.20 ± 3.71 | <i>Pseudomonas</i>                    | <i>Pseudomonas</i>                                       | ASV466 | 99.7         |
|                   | Pa30               | 17.33 ± 5.01                   | <i>Roseomonas</i>                     | <i>Devosia</i>                                           | ASV497 | 87.4         |
|                   | H31                | 24.21 ± 3.28                   | <i>Sphingomonas</i>                   | Unclassified_f__Sphingomonadaceae                        | ASV105 | 100.0        |
|                   | D32                | 20.34 ± 1.22                   | <i>Delftia</i>                        | <i>Delftia</i>                                           | ASV104 | 100.0        |
